# Supplementary material for: Nucleocapsid-specific T cell responses associate with control of SARS-CoV-2 in the upper airways before seroconversion
Source: PubMed Central journal article supplement (PMC10209201; doi:10.1038/s41467-023-38020-8), 2023-05-24
Supplement: 41467_2023_38020_MOESM1_ESM.pdf [file 41467_2023_38020_MOESM1_ESM.pdf]

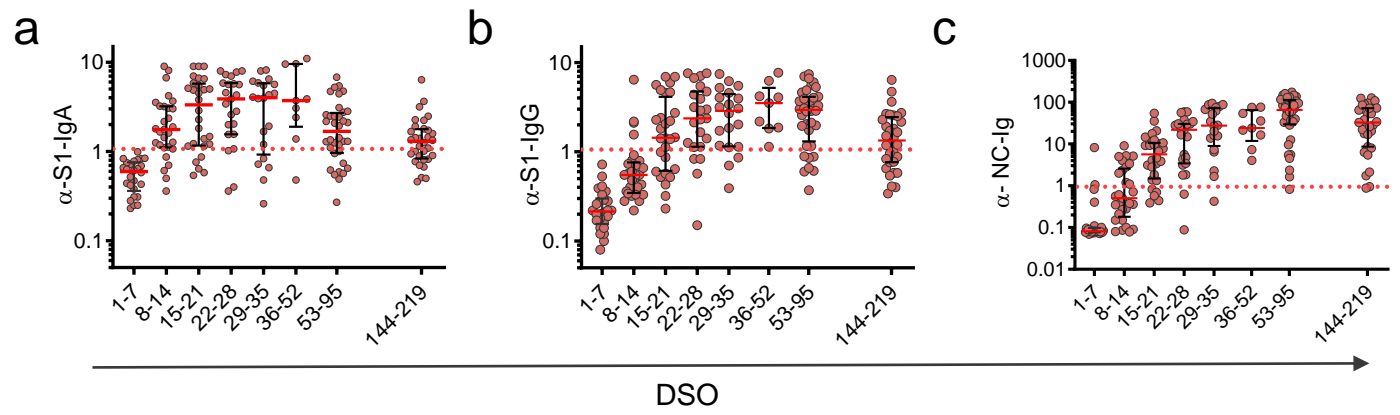

**Supplementary Figure 1. Dynamics of antibody responses against SARS-CoV-2.** (a-c) Antibody response dynamics are shown for S-specific IgA (ratio versus internal assay standard) (a), S-specific IgG (ratio versus internal assay standard) (b), and NC-specific total Ig in plasma (arbitrary units) (c). The cutoff for each assay is indicated by the dotted red line. Data are shown as median and IQR. DSO, days since symptom onset. Sample size at the different DSO: 1-7 DSO: n=25, 8-14 DSO: n= 30, 15-21 DSO: n= 28, 22-28 DSO: n=20, 29-35 DSO: n= 18, 36+ DSO: n=8, 60+ DSO: n=34, 180+ DSO: n=29.

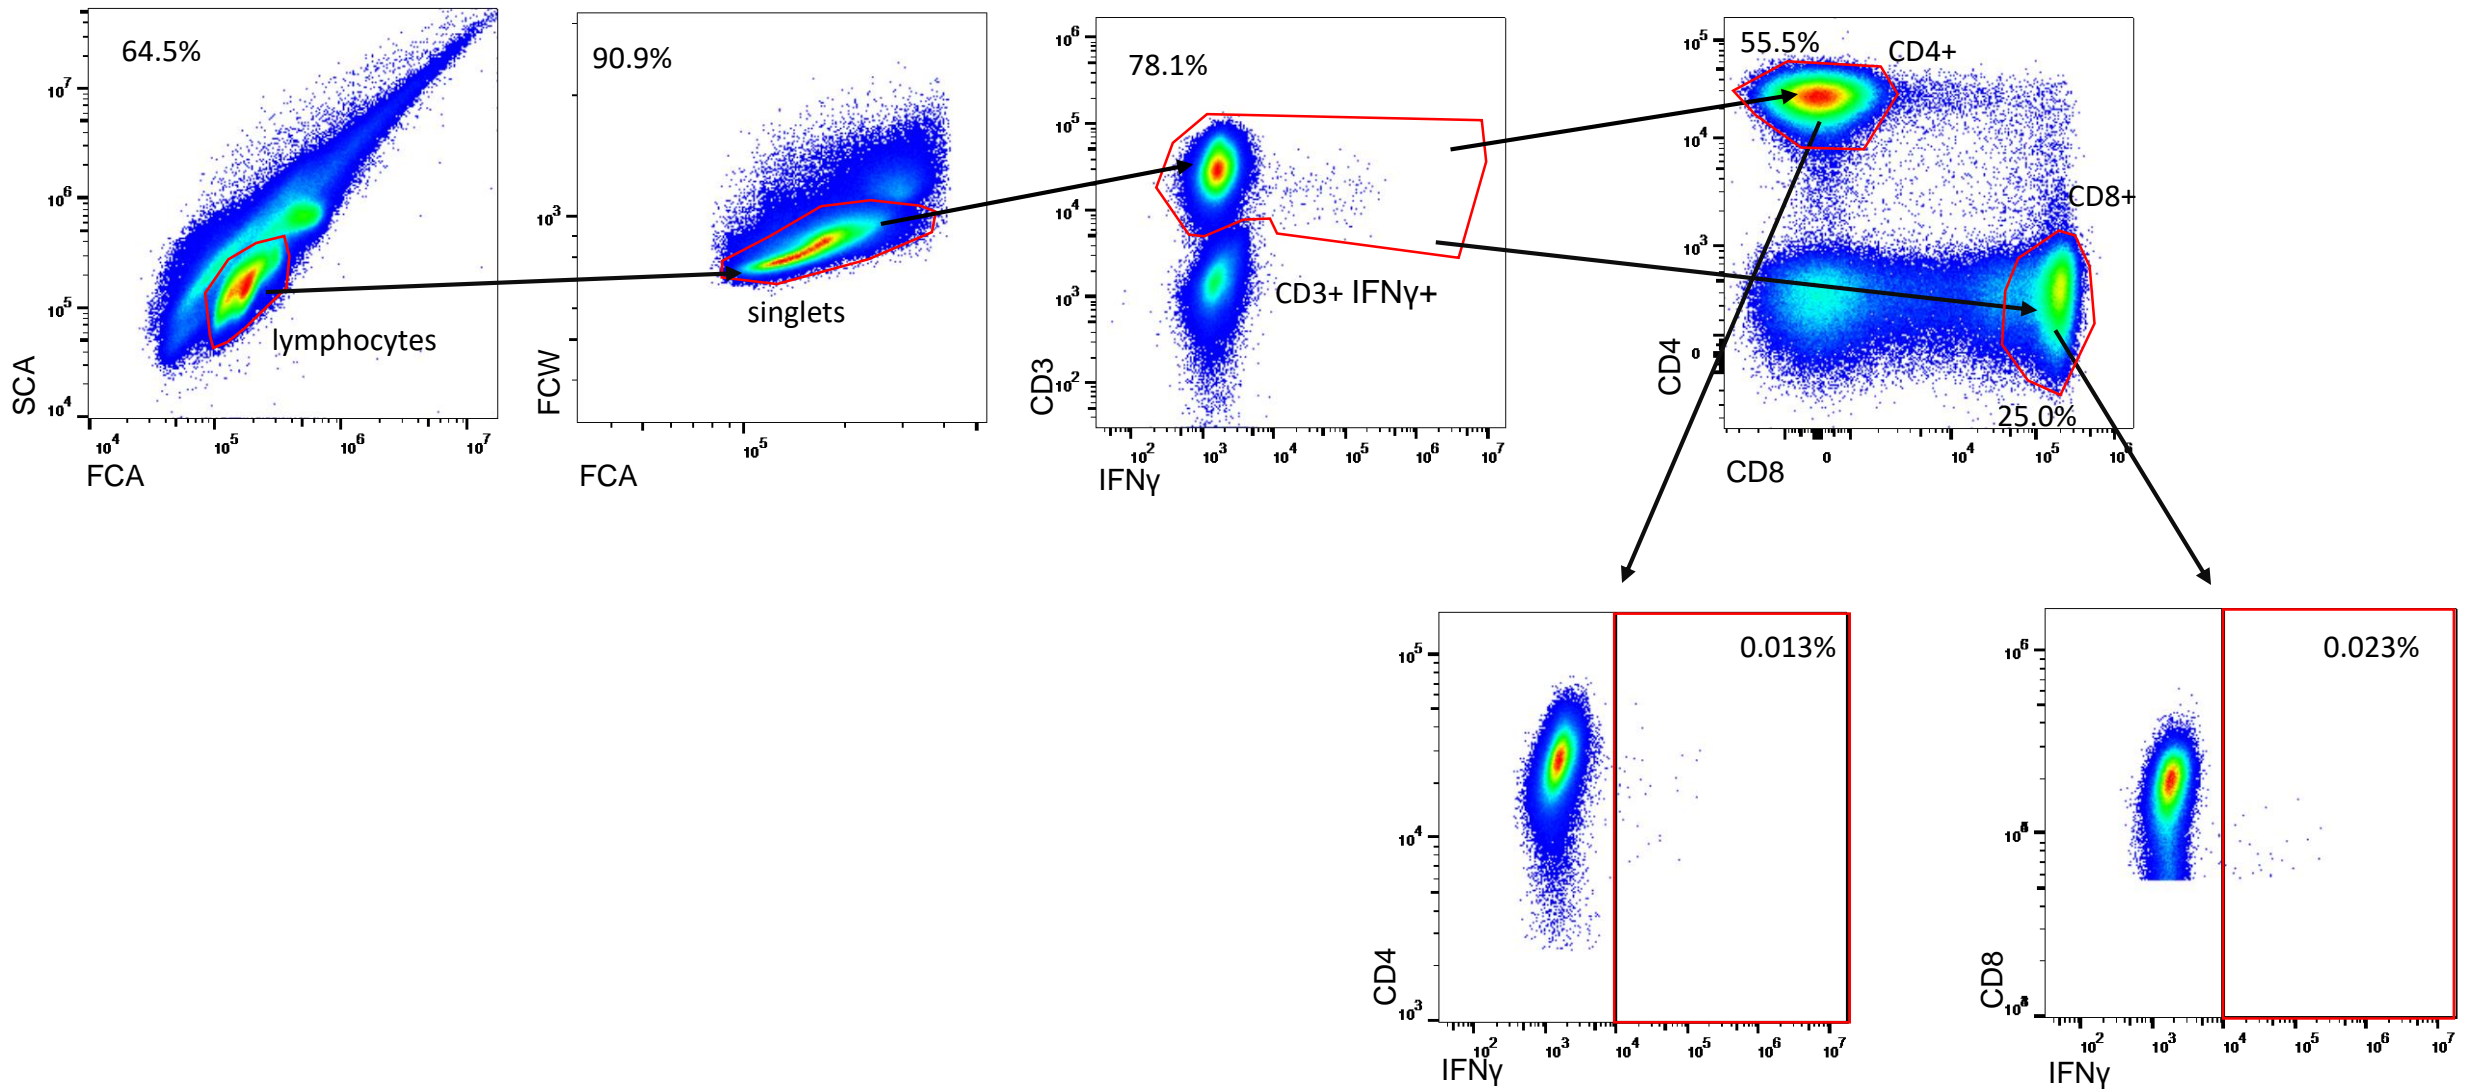

Supplementary figure 2: Gating strategy for gating NC or S- specific *IFN* $\gamma$  T cell

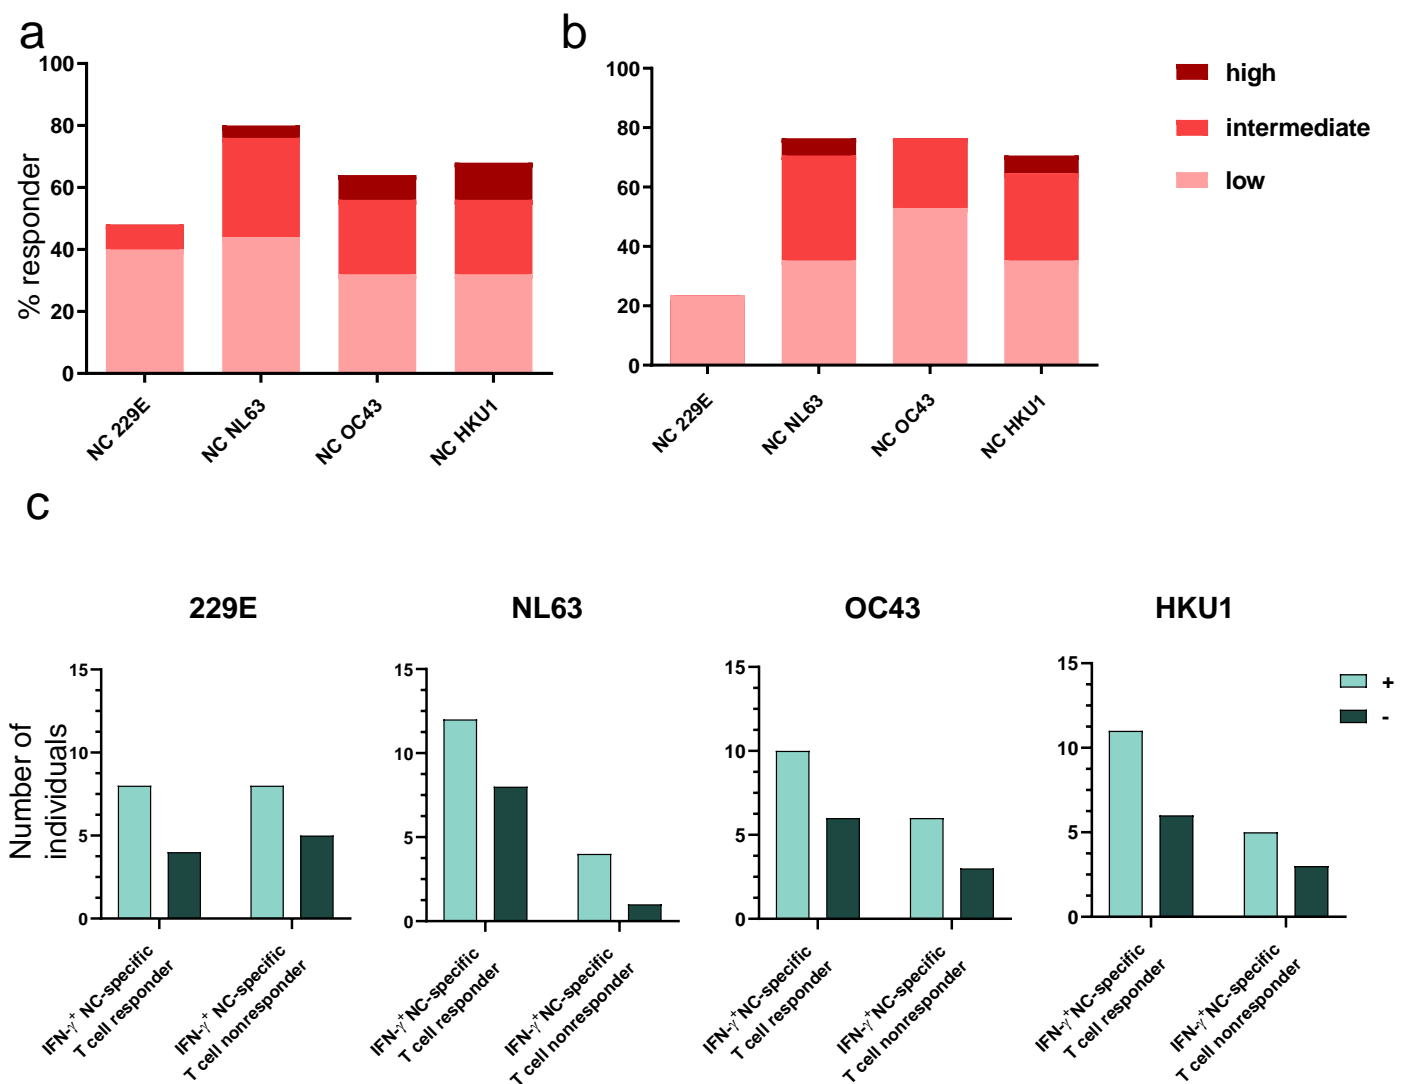

**Supplementary Figure 3. Antibody responses against common cold coronaviruses.** (a) Percent frequencies of responders ( $n = 24$ ) with high (dark red), intermediate (red), and low NC-specific antibody responses (pink) against each of the four common cold coronaviruses (CCCVs) during the first week after symptom onset. (b) Percent frequencies of non-vaccinated healthy controls ( $n = 17$ ) with high (dark red), intermediate (red), and low NC-specific antibody responses (pink) against each of the four CCCVs, as determined using manufacturer instructions. (c) Numbers of NC-specific T cell responders and non-responders with (light green) or without CCCV seroreactivity (dark green) during the first week after symptom onset. The number of patients for each condition was plotted and their distribution tested for significance using the Fishers exact test. None of the comparisons were significant ( $p < 0.05$ ).

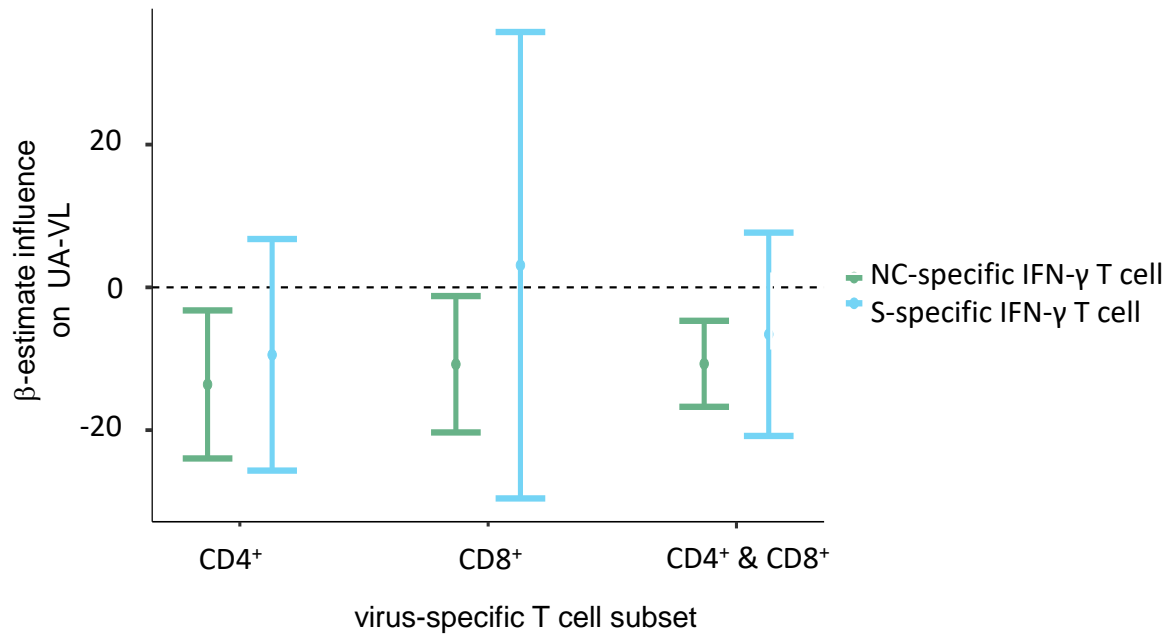

**Supplementary Figure 4. Nucleocapsid-specific CD4<sup>+</sup> and CD8<sup>+</sup> T cell responses incrementally reduce the upper airways burden of SARS-CoV-2.**

Summary of a censored linear mixed effects model showing the possible influence of SARS-CoV-2-specific T cells on upper airways viral loads (UA-VLs). Data from 33 individuals on different time points, yielding n=107 observations was studied. It was controlled for individual random effects and time fixed effects. Results are shown as  $\beta$ -estimates with 95% confidence intervals for NC-specific (green) and S-specific T cells (blue). Confidence intervals are computed using normal approximations, and are centered around the point estimates obtained from maximum likelihood estimation.

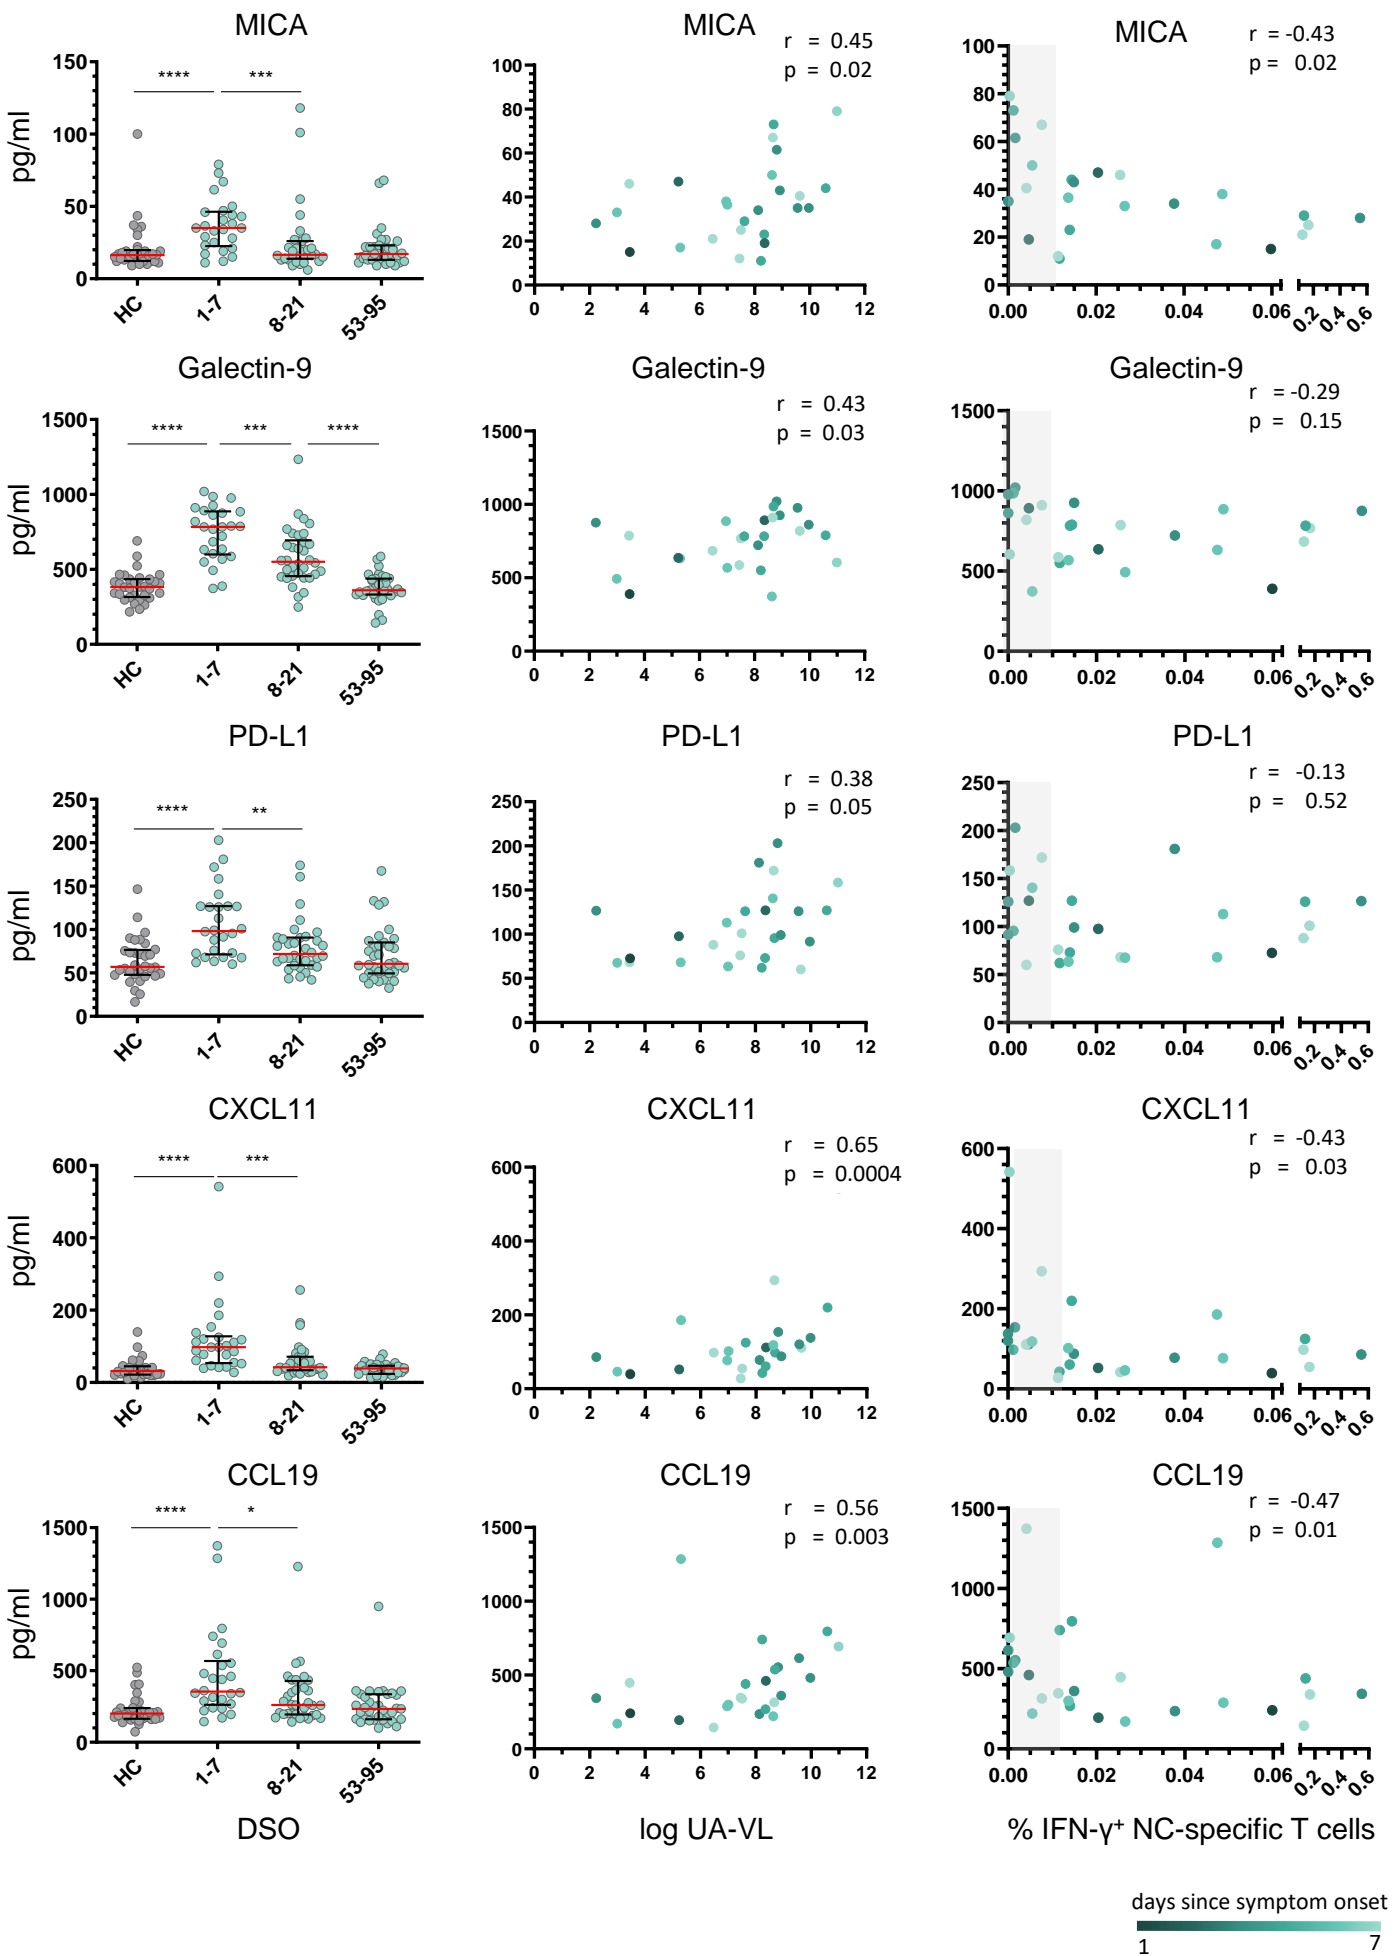

**Supplementary Figure 5. Dynamics of plasma soluble factors after infection with SARS-CoV-2.** Left: plasma concentrations of MICA, Galectin-9, PD-L1, CXCL11, and CCL19 are shown for healthy controls (n = 17) and longitudinally for patients (0-7 DSO: n=25, 8-21 DSO: n=32, 60+ DSO: n=35). Data are shown as median and IQR. MICA \*\*\*p = 0.0003, \*\*\*\*p < 0.0001, Galectin-9 \*\*\*p = 0.0006, \*\*\*\*p < 0.0001, PD-1L \*\*p = 0.0023, \*\*\*\*p < 0.0001; CXCL11 \*\*\*p = 0.001, \*\*\*\*p < 0.0001; CCL19 \*p < 0.02, \*\*\*\*p < 0.0001 (Mann-Whitney U test, two-sided test). Middle: Spearman rank correlations showing plasma soluble factors versus upper airways viral loads (UA-VLs) during the first week after symptom onset (key). Right: Spearman rank correlations showing plasma soluble factors versus nucleocapsid (NC)-specific T cell frequencies during the first week after symptom onset (key). The different shades of green in the middle and right panels indicate for each subject on which day during the first week after symptom onset the sample was collected. For spearman rank correlation the P-values (two-sided) is indicated in the graph

a

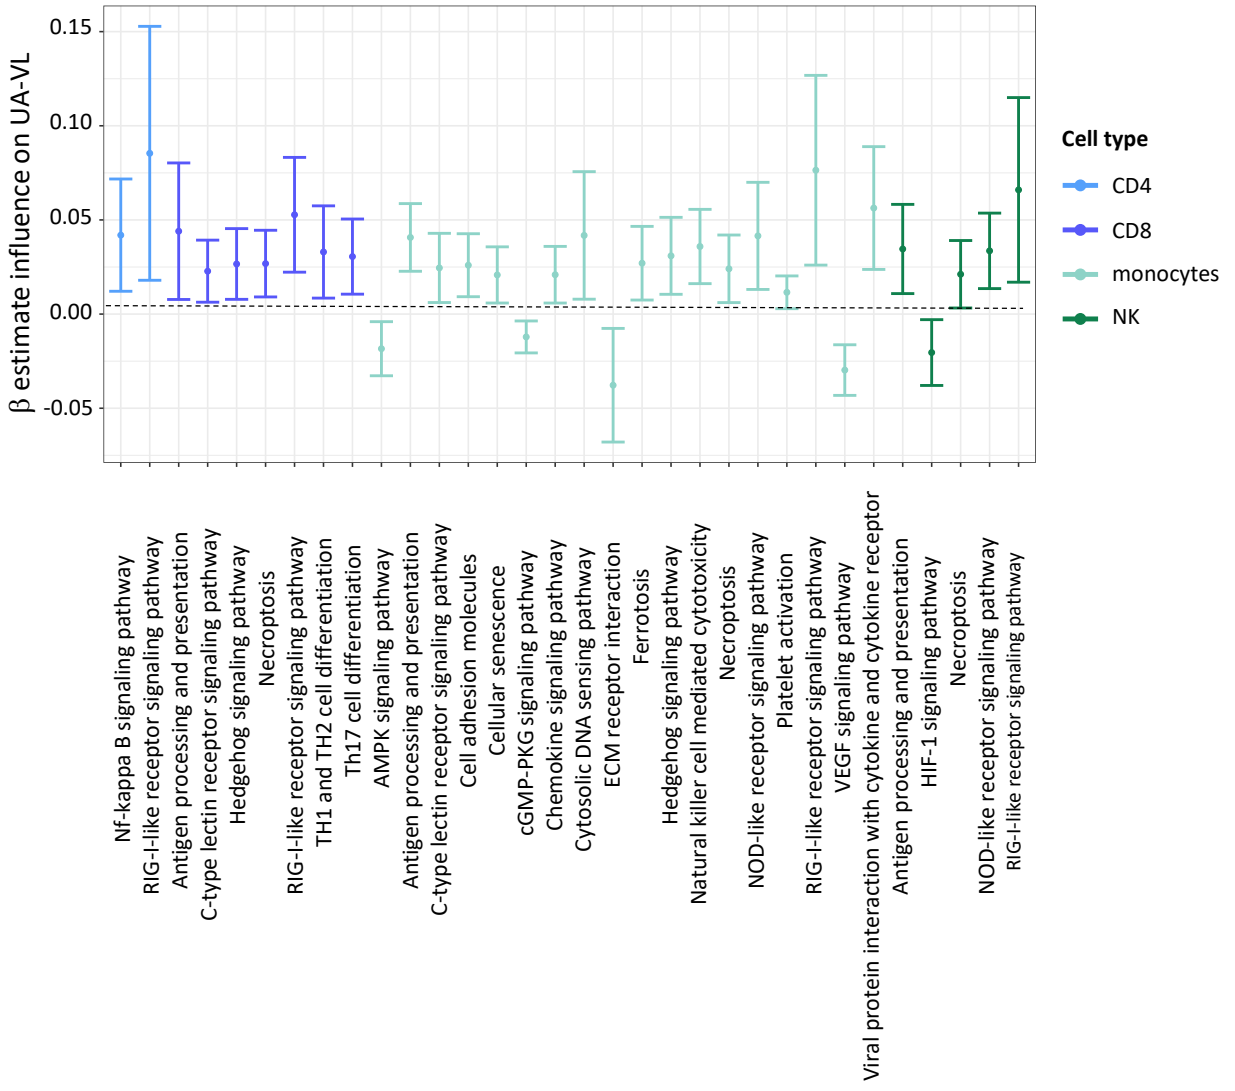

b

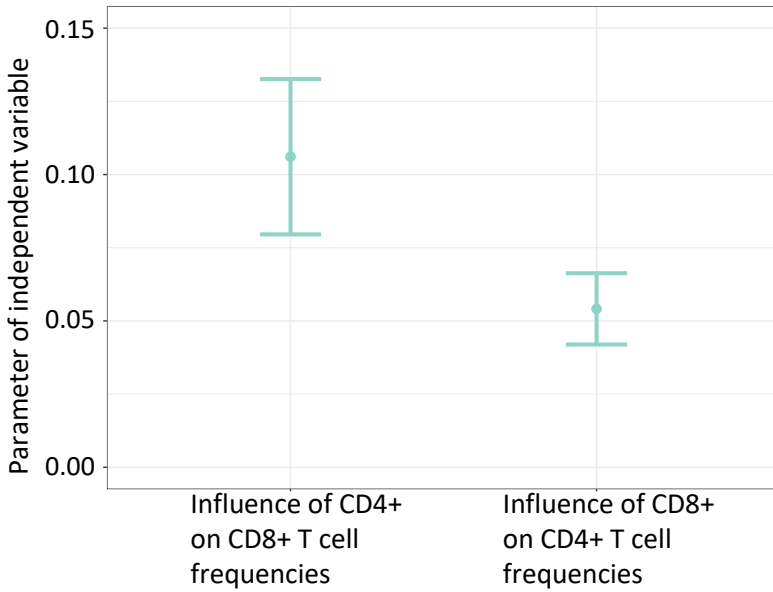

**Supplementary Figure 6. Modeling interactions between upper airways viral loads and activation of immune pathways in circulating immune cell subsets controlled for the influence of NC-specific T cell responses.**

Data from 33 individuals on different time points, yielding  $n=107$  observations was studied. Dots indicate point estimates, and whiskers indicate 95% confidence intervals. Confidence intervals are computed using normal approximations, and are centered around the point estimates obtained from maximum likelihood estimation. For hypothesis testing, we tested whether parameters are significantly different from zero using a two-sided t-test with 106 degrees of freedom and without multiple testing correction. (a)  $\beta$ -estimates for the interaction between upper airways viral loads (UA-VLs) and selected immune pathway scores achieving significance in the pre-selection ( $p < 0.05$ ). Estimates were obtained using a censored linear mixed model. Results are clustered according to immune cell subsets (key). (b) Expected influence of NC-specific CD4+ T cells on NC-specific CD8+ T cell responses (left) and vice versa (right). Estimates were obtained using two separate linear mixed effect models and found to be significant ( $p < 0.0001$ ). For detail p-values from supplementary figure 6a see supplementary table 5



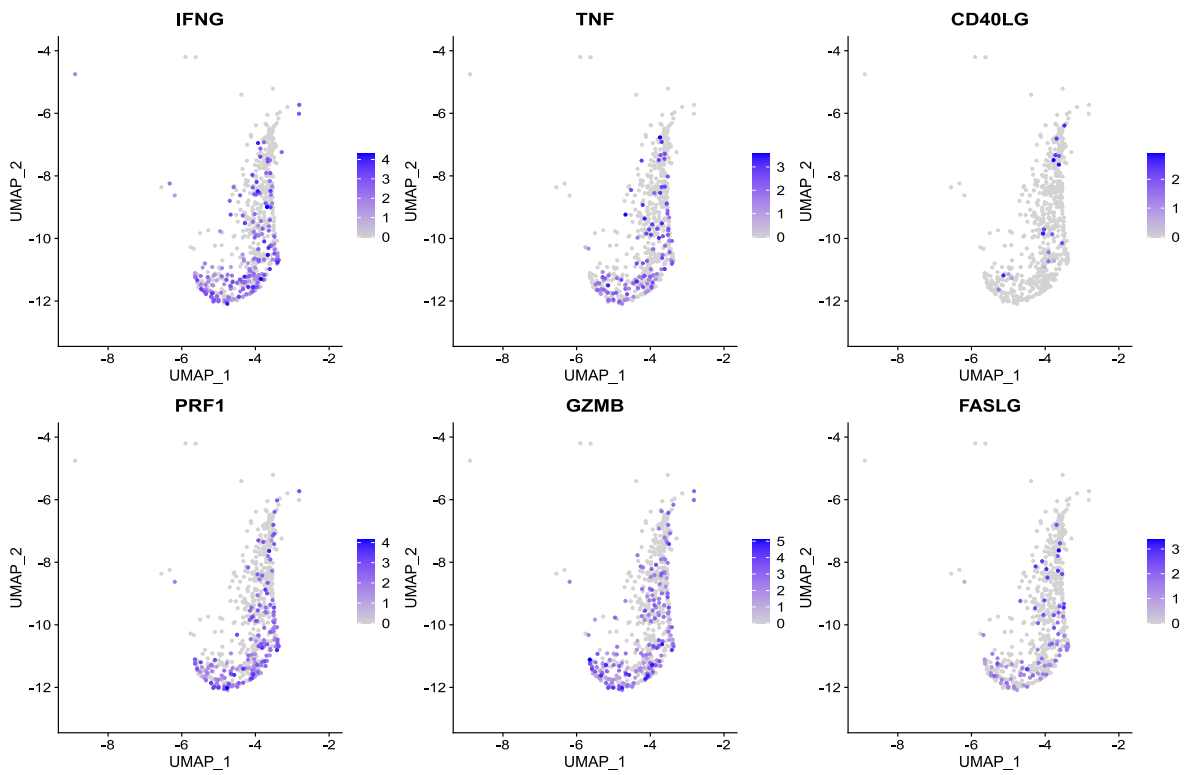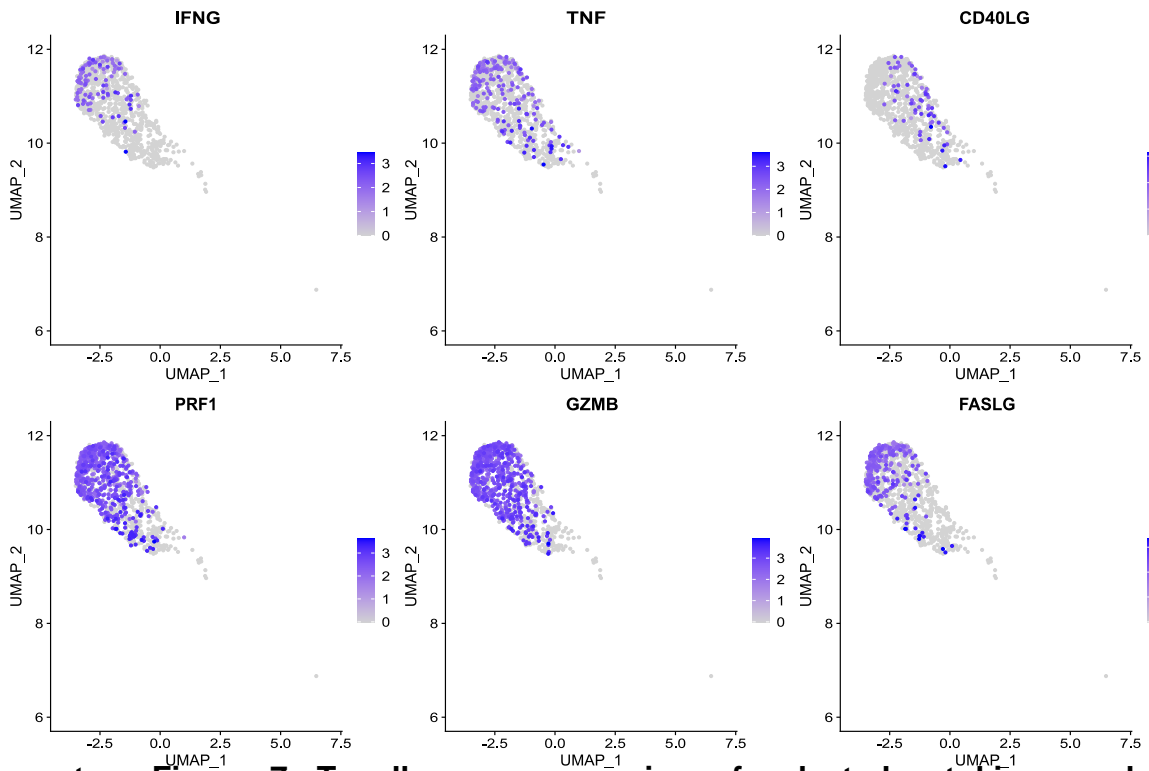

**Supplementary Figure 7. T cell gene expression of selected cytokines and cytotoxic effector molecules in upper airway epithelia during acute SARS-CoV-2 infection.** Expression of the indicated genes is shown for T cells from upper airway epithelia for two data sets (Ziegler and Yoshida). The color code indicates the number of mRNA transcripts detected for the indicated gene.

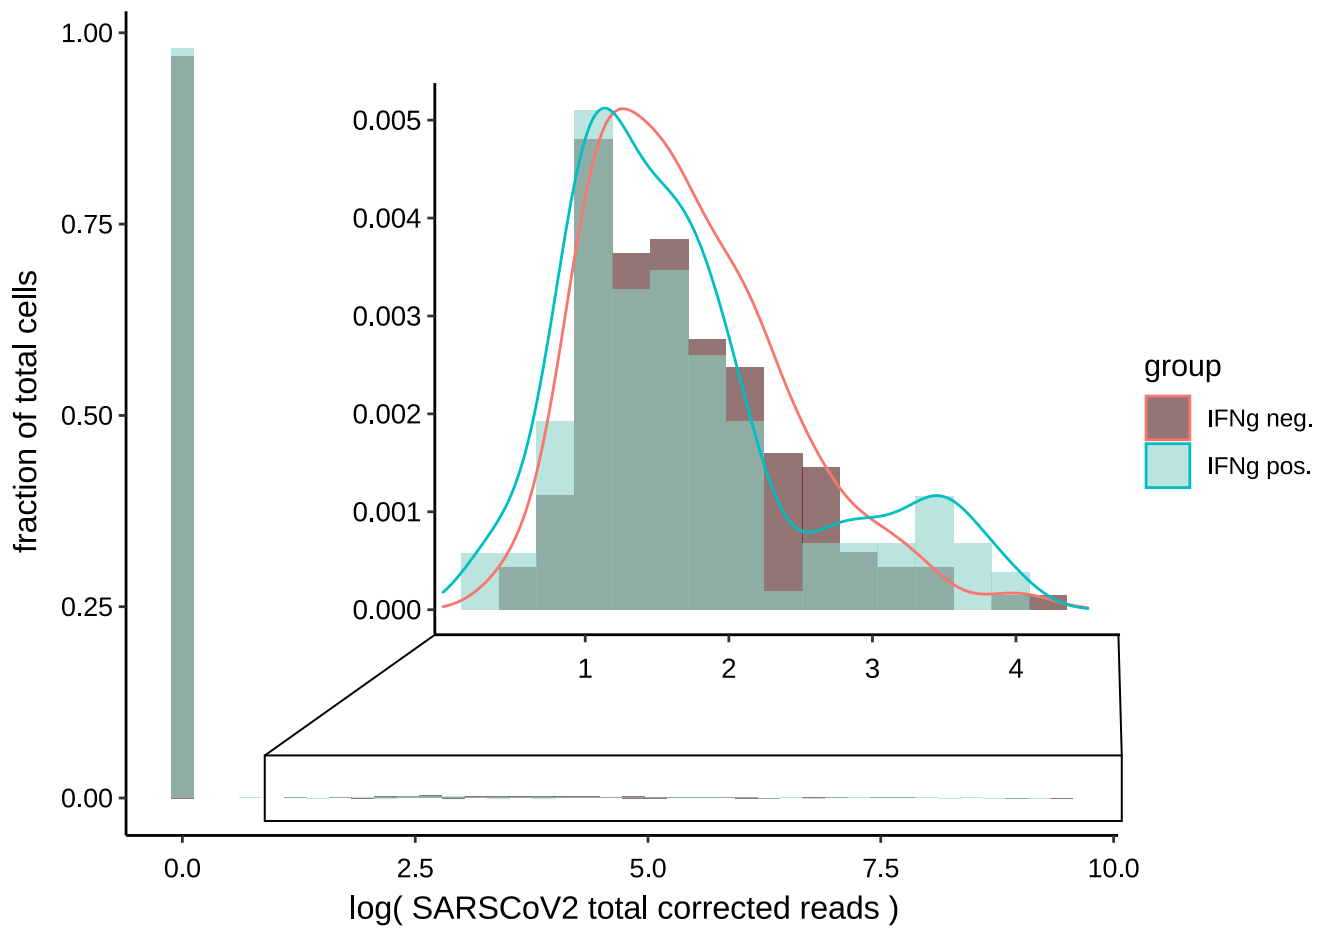

**Supplementary Figure 8.** Relationship between IFN- $\gamma$  mRNA expression by T cells and detected SARS-CoV-2 RNA within nasopharyngeal epithelial cells. The graph shows the distribution of the logarithm of total corrected read counts of intracellular SARS-CoV-2 RNA in responders (blue) and non-responders (red). Responders with IFN- $\gamma$  mRNA expressing T cells were characterized by lower counts and greater numbers of cells without SARS-CoV-2 RNA. The effect was significant ( $p = 0.00013$ ).

Supplementary table 1. Exact p –values for figure 4 a

| EIF2AK2   |           |        |
|-----------|-----------|--------|
| correlate | tissue    | pvalue |
| vir       | CD8       | 0.05   |
| cd8ifn    | CD8       | 0.422  |
| cd4ifn    | CD8       | 0.05   |
| vir       | CD4       | 0.0202 |
| cd8ifn    | CD4       | 0.3778 |
| cd4ifn    | CD4       | 0.0006 |
| vir       | NK        | 0.035  |
| cd8ifn    | NK        | 0.1054 |
| cd4ifn    | NK        | 0.0008 |
| vir       | Monocytes | 0.1602 |
| cd8ifn    | Monocytes | 0.5078 |
| cd4ifn    | Monocytes | 0.015  |
| OAS1      |           |        |
| correlate | tissue    | pvalue |
| vir       | CD8       | 0.2398 |
| cd8ifn    | CD8       | 0.3567 |
| cd4ifn    | CD8       | 0.0351 |
| vir       | CD4       | 0.5729 |
| cd8ifn    | CD4       | 0.237  |
| cd4ifn    | CD4       | 0.1708 |
| vir       | NK        | 0.2334 |
| cd8ifn    | NK        | 0.4312 |
| cd4ifn    | NK        | 0.0053 |
| vir       | Monocytes | 0.0544 |
| cd8ifn    | Monocytes | 0.1133 |
| cd4ifn    | Monocytes | 0.0021 |
| STAT1     |           |        |
| correlate | tissue    | pvalue |
| vir       | CD8       | 0.0202 |
| cd8ifn    | CD8       | 0.4784 |
| cd4ifn    | CD8       | 0.0159 |
| vir       | CD4       | 0.084  |
| cd8ifn    | CD4       | 0.8682 |
| cd4ifn    | CD4       | 0.0116 |
| vir       | NK        | 0.0064 |
| cd8ifn    | NK        | 0.1514 |
| cd4ifn    | NK        | 0.0244 |
| vir       | Monocytes | 0.0522 |
| cd8ifn    | Monocytes | 0.4979 |
| cd4ifn    | Monocytes | 0.0058 |

Supplementary table 2. Exact p –values for figure 4 b

| Description                               | p.value |
|-------------------------------------------|---------|
| NF-kappa B signaling pathway              | 0.0024  |
| JAK-STAT signaling pathway                | 0.0033  |
| Th17 cell differentiation                 | 0.0053  |
| B cell receptor signaling pathway         | 0.0109  |
| Th1 and Th2 cell differentiation          | 0.0128  |
| NOD-like receptor signaling pathway       | 0.0145  |
| Cytokine-cytokine receptor interaction    | 0.0195  |
| RIG-I-like receptor signaling pathway     | 0.0225  |
| Fc gamma R-mediated phagocytosis          | 0.0258  |
| PI3K-Akt signaling pathway                | 0.0279  |
| T cell receptor signaling pathway         | 0.0286  |
| TGF-beta signaling pathway                | 0.0342  |
| Hematopoietic cell lineage                | 0.036   |
| MAPK signaling pathway                    | 0.0446  |
| Ras signaling pathway                     | 0.0456  |
| Wnt signaling pathway                     | 0.0467  |
| Antigen processing and presentation       | 0.0523  |
| Toll-like receptor signaling pathway      | 0.0558  |
| Cell adhesion molecules                   | 0.0676  |
| ErbB signaling pathway                    | 0.0734  |
| Chemokine signaling pathway               | 0.0826  |
| TNF signaling pathway                     | 0.0826  |
| Phospholipase D signaling pathway         | 0.0843  |
| Hedgehog signaling pathway                | 0.0981  |
| Natural killer cell mediated cytotoxicity | 0.1036  |
| Rap1 signaling pathway                    | 0.1258  |
| VEGF signaling pathway                    | 0.1346  |
| FoxO signaling pathway                    | 0.1415  |
| Leukocyte transendothelial migration      | 0.1821  |
| Neutrophil extracellular trap formation   | 0.1933  |
| Platelet activation                       | 0.236   |
| Fc epsilon RI signaling pathway           | 0.2392  |
| ECM-receptor interaction                  | 0.2425  |
| Hippo signaling pathway                   | 0.2804  |
| Notch signaling pathway                   | 0.2913  |
| C-type lectin receptor signaling pathway  | 0.3062  |
| IL-17 signaling pathway                   | 0.3176  |
| mTOR signaling pathway                    | 0.3373  |
| 30.random                                 | NA      |
| 300.random                                | NA      |

Supplementary table 3. Exact p –values for figure 4 c

| Description                                                   | p.value |
|---------------------------------------------------------------|---------|
| NF-kappa B signaling pathway                                  | 0.0202  |
| Apelin signaling pathway                                      | 0.076   |
| RIG-I-like receptor signaling pathway                         | 0.2375  |
| Platelet activation                                           | 0.3865  |
| Ras signaling pathway                                         | 0.3821  |
| TNF signaling pathway                                         | 0.3403  |
| Neutrophil extracellular trap formation                       | 0.3362  |
| TGF-beta signaling pathway                                    | 0.3362  |
| Cytosolic DNA-sensing pathway                                 | 0.3126  |
| Natural killer cell mediated cytotoxicity                     | 0.3049  |
| Phospholipase D signaling pathway                             | 0.2899  |
| Neuroactive ligand-receptor interaction                       | 0.2647  |
| Cytokine-cytokine receptor interaction                        | 0.2543  |
| Leukocyte transendothelial migration                          | 0.2342  |
| Fc gamma R-mediated phagocytosis                              | 0.231   |
| Toll-like receptor signaling pathway                          | 0.1914  |
| ECM-receptor interaction                                      | 0.1914  |
| Chemokine signaling pathway                                   | 0.1539  |
| cAMP signaling pathway                                        | 0.1466  |
| Viral protein interaction with cytokine and cytokine receptor | 0.1174  |
| Calcium signaling pathway                                     | 0.0943  |
| Sphingolipid signaling pathway                                | 0.053   |
| Complement and coagulation cascades                           | 0.0267  |
| Fc epsilon RI signaling pathway                               | 0.0233  |
| VEGF signaling pathway                                        | 0.0083  |
| 30.random                                                     | NA      |
| 300.random                                                    | NA      |

Supplementary table 4. Exact p –values for figure 4 d

| Description                               | p.value |
|-------------------------------------------|---------|
| cGMP-PKG signaling pathway                | 0.1755  |
| 30.random                                 | NA      |
| 300.random                                | NA      |
| Fc epsilon RI signaling pathway           | 0.3825  |
| C-type lectin receptor signaling pathway  | 0.374   |
| Antigen processing and presentation       | 0.3656  |
| VEGF signaling pathway                    | 0.3656  |
| mTOR signaling pathway                    | 0.3176  |
| Natural killer cell mediated cytotoxicity | 0.3099  |
| Cell adhesion molecules                   | 0.2877  |
| Phospholipase D signaling pathway         | 0.2806  |
| Cytokine-cytokine receptor interaction    | 0.2665  |
| Th1 and Th2 cell differentiation          | 0.2463  |
| Wnt signaling pathway                     | 0.1973  |
| IL-17 signaling pathway                   | 0.1973  |
| PI3K-Akt signaling pathway                | 0.1602  |
| T cell receptor signaling pathway         | 0.1553  |
| Chemokine signaling pathway               | 0.1553  |
| Th17 cell differentiation                 | 0.1323  |
| ECM-receptor interaction                  | 0.1281  |
| Toll-like receptor signaling pathway      | 0.1198  |
| TNF signaling pathway                     | 0.1081  |
| JAK-STAT signaling pathway                | 0.0544  |
| Fc gamma R-mediated phagocytosis          | 0.0544  |
| MAPK signaling pathway                    | 0.0522  |
| NOD-like receptor signaling pathway       | 0.05    |
| B cell receptor signaling pathway         | 0.042   |
| ErbB signaling pathway                    | 0.035   |
| RIG-I-like receptor signaling pathway     | 0.0237  |
| NF-kappa B signaling pathway              | 0.0041  |

Supplementary table 5. Exact p –values for each coeffcent from supplementary figure 6a

| pathway       | name                                                          | p_value     |
|---------------|---------------------------------------------------------------|-------------|
| CD4_hsa04622  | RIG-I-like receptor signaling pathway                         | 0.013061682 |
| CD4_hsa04064  | NF-kappa B signaling pathway                                  | 0.005843416 |
| CD8_hsa04622  | RIG-I-like receptor signaling pathway                         | 0.000694107 |
| CD8_hsa04625  | C-type lectin receptor signaling pathway                      | 0.006727923 |
| CD8_hsa04612  | Antigen processing and presentation                           | 0.017345714 |
| CD8_hsa04658  | Th1 and Th2 cell differentiation                              | 0.005486681 |
| CD8_hsa04659  | Th17 cell differentiation                                     | 0.00271064  |
| CD8_hsa04340  | Hedgehog signaling pathway                                    | 0.005486681 |
| CD8_hsa04217  | Necroptosis                                                   | 0.002999916 |
| Mono_hsa04611 | Platelet activation                                           | 0.009198027 |
| Mono_hsa04621 | NOD-like receptor signaling pathway                           | 0.00421168  |
| Mono_hsa04622 | RIG-I-like receptor signaling pathway                         | 0.002960069 |
| Mono_hsa04623 | Cytosolic DNA-sensing pathway                                 | 0.015607369 |
| Mono_hsa04625 | C-type lectin receptor signaling pathway                      | 0.008933603 |
| Mono_hsa04650 | Natural killer cell mediated cytotoxicity                     | 0.000361973 |
| Mono_hsa04612 | Antigen processing and presentation                           | 8.99882E-06 |
| Mono_hsa04062 | Chemokine signaling pathway                                   | 0.006448565 |
| Mono_hsa04061 | Viral protein interaction with cytokine and cytokine receptor | 0.000710879 |
| Mono_hsa04512 | ECM-receptor interaction                                      | 0.014123945 |
| Mono_hsa04514 | Cell adhesion molecules                                       | 0.002356341 |
| Mono_hsa04340 | Hedgehog signaling pathway                                    | 0.003002655 |
| Mono_hsa04370 | VEGF signaling pathway                                        | 1.44629E-05 |
| Mono_hsa04022 | cGMP-PKG signaling pathway                                    | 0.005045123 |
| Mono_hsa04152 | AMPK signaling pathway                                        | 0.012071256 |
| Mono_hsa04216 | Ferroptosis                                                   | 0.006773564 |
| Mono_hsa04217 | Necroptosis                                                   | 0.008614264 |
| Mono_hsa04218 | Cellular senescence                                           | 0.006292951 |
| NK_hsa04621   | NOD-like receptor signaling pathway                           | 0.001026402 |
| NK_hsa04622   | RIG-I-like receptor signaling pathway                         | 0.008359055 |
| NK_hsa04612   | Antigen processing and presentation                           | 0.004235453 |
| NK_hsa04066   | HIF-1 signaling pathway                                       | 0.021909713 |
| NK_hsa04217   | Necroptosis                                                   | 0.020659667 |

CD4: CD4 Tcell; CD8: CD8 Tcell; Mono: Monocytin; NK: Natural killer cells
