# Supplementary material for: Nucleocapsid-specific T cell responses associate with control of SARS-CoV-2 in the upper airways before seroconversion
Source: PubMed Central journal article supplement (PMC10209201; doi:10.1038/s41467-023-38020-8), 2023-05-24
Supplement: 41467_2023_38020_MOESM3_ESM.pdf [file 41467_2023_38020_MOESM3_ESM.pdf]

## **Description of additional supplementary files**

**Supplementary Dataset 1** Ziegler\_DifferentialGeneExpression\_allCellTypes.xlsx Differentially expressed genes within all nasopharyngeal epithelial cell type clusters between acutely SARS-CoV-2 infected subjects with and without T cells expressing IFN- $\gamma$  mRNA from the Ziegler dataset.

**Supplementary Dataset 2** Ziegler\_pathwayEnrichment\_allCellTypes.xlsx Enrichment of a subset of KEGG pathway of all nasopharyngeal epithelial cell type clusters between acutely SARS-CoV-2 infected subjects with and without T cells expressing IFN- $\gamma$  mRNA from the Ziegler dataset. The pathways were limited to those contained in the BRITE categories Signal Transduction, Signaling Molecules and Interaction, Immune System, and Cell Growth and Death.

**Supplementary Dataset 3** Ziegler\_goEnrichment\_allCellTypes.xlsx Enrichment of a Gene Ontology terms of all nasopharyngeal epithelial cell type clusters between acutely SARS-CoV-2 infected subjects with and without T cells expressing IFN- $\gamma$  mRNA from the Ziegler dataset.

**Supplementary Dataset 4** Yoshida\_DifferentialGeneExpression\_allCellTypes.xlsx Differentially expressed genes within all nasal epithelial cell type clusters between acutely SARS-CoV-2 infected subjects with and without T cells expressing IFN- $\gamma$  mRNA from the Yoshida dataset.

**Supplementary Dataset 5** Yoshida\_pathwayEnrichment\_allCellTypes.xlsx Enrichment of a subset of KEGG pathway of all nasal epithelial cell type clusters between acutely SARS-CoV-2 infected subjects with and without T cells expressing IFN- $\gamma$  mRNA from the Yoshida dataset. The pathways were limited to those contained in the BRITE categories Signal Transduction, Signaling Molecules and Interaction, Immune System, and Cell Growth and Death.

**Supplementary Dataset 6** Yoshida\_goEnrichment\_allCellTypes.xlsx Enrichment of a Gene Ontology terms of all nasal epithelial cell type clusters between acutely SARS-CoV-2 infected subjects with and without T cells expressing IFN- $\gamma$  mRNA from the Yoshida dataset.

**Supplementary Dataset 7** GenesOfInterest\_tcells.xlsx mRNA expression of selected set of cytokines, effector molecules and other genes of interest in T cells of the upper airway epithelia. The table shows percentage of T cells and absolute numbers of acutely SARS-CoV-2 infected subjects which express respective genes in Ziegler and Yoshida data sets.
